# Supplementary material
Source: ML conference proceedings conference paper supplement (https://openaccess.thecvf.com/content/CVPR2024/html/Osowiechi_NC-TTT_A_Noise_CVPR_2024_paper.html)
Supplement: Supplementary file 1 [file Osowiechi_NC-TTT_A_Noise_CVPR_2024_supplemental.pdf]

# NC-TTT: A Noise Contrastive Approach for Test-Time Training - Supplementary Material

David Osowiechi\*    Gustavo A. Vargas Hakim\*  
 Mehrdad Noori    Milad Cheraghlikhani    Ali Bahri    Moslem Yazdanpanah  
 Ismail Ben Ayed    Christian Desrosiers

ÉTS Montréal, Canada

## A. Deriving the posterior of Equation (6)

We start with the definition of the posterior in Eq. (5):

$$p(y_s = 1 | \tilde{\mathbf{z}}_{i,m}) = \frac{\sigma_s^{-D} \exp\left(-\frac{1}{2\sigma_s^2} \|\epsilon\|^2\right)}{\sigma_s^{-D} \exp\left(-\frac{1}{2\sigma_s^2} \|\epsilon\|^2\right) + \sigma_o^{-D} \exp\left(-\frac{1}{2\sigma_o^2} \|\epsilon\|^2\right)},$$

where  $\epsilon = \tilde{\mathbf{z}}_i - \mathbf{z}_i$ . Multiplying the numerator and denominator by  $\sigma_s^D \exp\left(\frac{1}{2\sigma_s^2} \|\epsilon\|^2\right)$  gives

$$p(y_s = 1 | \tilde{\mathbf{z}}_{i,m}) = \frac{1}{1 + (\sigma_s/\sigma_o)^D \exp\left(-\frac{1}{2}(1/\sigma_s^2 - 1/\sigma_o^2) \|\epsilon\|^2\right)}$$

We then use the following equality

$$\begin{aligned} (\sigma_s/\sigma_o)^D &= \exp\left(\log(\sigma_s/\sigma_o)^D\right) \\ &= \exp\left(D \log(\sigma_s/\sigma_o)\right) \end{aligned}$$

to obtain

$$p(y_s = 1 | \tilde{\mathbf{z}}_{i,m}) = \frac{1}{1 + \exp\left(-\frac{1}{2}(1/\sigma_s^2 - 1/\sigma_o^2) \|\epsilon\|^2 + D \log(\sigma_s/\sigma_o)\right)}$$

Last, since  $\log(\sigma_s/\sigma_o) = -\log(\sigma_o/\sigma_s)$ , we finally get  $p(y_s = 1 | \tilde{\mathbf{z}}) = 1/(1 + \exp(-u))$  with

$$u = \frac{1}{2} \left( \frac{1}{\sigma_o^2} - \frac{1}{\sigma_s^2} \right) \|\epsilon\|^2 + D \log\left(\frac{\sigma_o}{\sigma_s}\right) \quad \square$$

## B. Results on different levels of CIFAR-10-C corruptions

We evaluate NC-TTT on the remaining severity levels of CIFAR-10-C (see Tables 1-4). Accuracy decreases on all

\*Equal contribution.  
 david.osowiechi.1@ens.etsmtl.ca,  
 hakim.1@ens.etsmtl.ca

Correspondence to  
 gustavo-adolfo.vargas-hakim.1@ens.etsmtl.ca

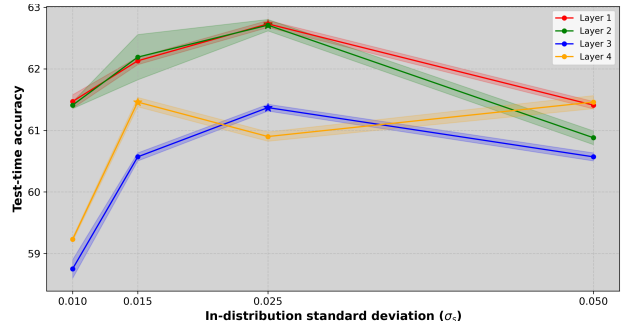

Figure 1. Test-time accuracy on different layer blocks with different in-distribution standard deviation.

methods as the severity augments, but NC-TTT outperforms the closest competitors from the *state-of-the-art* on the majority of the corruptions and in average for the whole dataset. To be more precise, when considering NC-TTT at a lower severity level (refer to Table 4), it demonstrates superior performance across all corruptions, with the exception of *Gaussian Noise* and *JPEG compression*. This is noteworthy, given that Gaussian noise is introduced to features during training.

## C. Hyperparameter search on VisDA-C

In order to choose the best configuration for VisDA-C, we performed a hyperparameter search considering the four different layer blocks from ResNet50 as well as four different in-distribution noise standard deviation values (i.e., 0.01, 0.015, 0.025, 0.05). The results are obtained across three executions per combination. We show in Fig.1 that the best performance can be generally obtained on the first layer of the network, consistent with previous results in the field [2, 3, 5, 6]. Furthermore, an in-distribution standard deviation  $\sigma_s = 0.025$  is found to perform the best across all the different layers.

|                   | ResNet50 | LAME [1]    | PTBN [4]    | TENT [7]    | TTT [6]            | TTT++ [3]   | ClusT3 [2]         | NC-TTT (ours)      |
|-------------------|----------|-------------|-------------|-------------|--------------------|-------------|--------------------|--------------------|
| Gaussian Noise    | 28.02    | 26.22 ±0.21 | 61.39 ±0.10 | 61.19 ±0.26 | 70.63 ±0.04        | 78.70 ±4.28 | <b>79.14 ±0.03</b> | 78.09 ±0.02        |
| Shot noise        | 38.33    | 37.06 ±0.17 | 66.57 ±0.06 | 66.2 ±0.18  | 75.18 ±0.04        | 80.12 ±0.12 | <b>81.51 ±0.15</b> | 81.33 ±0.10        |
| Impulse Noise     | 46.12    | 45.03 ±0.17 | 63.56 ±0.20 | 62.98 ±0.19 | 65.91 ±0.04        | 70.64 ±0.53 | <b>76.95 ±0.07</b> | 75.52 ±0.08        |
| Defocus blur      | 67.33    | 67.70 ±0.07 | 85.48 ±0.12 | 85.32 ±0.18 | <b>91.95 ±0.02</b> | 81.75 ±0.43 | 90.33 ±0.09        | 91.91 ±0.05        |
| Glass blur        | 34.42    | 32.63 ±0.09 | 52.26 ±0.04 | 52.08 ±0.15 | 60.44 ±0.05        | 62.85 ±0.50 | <b>71.09 ±0.17</b> | 69.95 ±0.09        |
| Motion blur       | 63.71    | 64.00 ±0.01 | 80.78 ±0.12 | 80.75 ±0.09 | 86.29 ±0.10        | 68.42 ±1.08 | 87.87 ±0.11        | <b>89.02 ±0.10</b> |
| Zoom blur         | 61.27    | 62.12 ±0.21 | 83.33 ±0.11 | 83.28 ±0.10 | 89.90 ±0.04        | 70.74 ±2.05 | 88.86 ±0.04        | <b>90.96 ±0.05</b> |
| Snow              | 72.15    | 72.18 ±0.04 | 73.25 ±0.16 | 73.17 ±0.25 | 81.25 ±0.02        | 52.43 ±0.56 | 84.30 ±0.07        | <b>85.36 ±0.06</b> |
| Frost             | 62.27    | 61.72 ±0.06 | 73.41 ±0.22 | 73.54 ±0.16 | 83.83 ±0.04        | 52.80 ±2.67 | 87.17 ±0.07        | <b>88.08 ±0.02</b> |
| Fog               | 81.86    | 82.07 ±0.03 | 83.88 ±0.06 | 83.81 ±0.09 | 90.62 ±0.05        | 41.75 ±0.09 | 90.03 ±0.02        | <b>92.07 ±0.07</b> |
| Brightness        | 87.58    | 87.64 ±0.08 | 86.81 ±0.05 | 86.81 ±0.23 | 92.87 ±0.09        | 50.95 ±2.19 | <b>92.99 ±0.06</b> | <b>94.41 ±0.03</b> |
| Contrast          | 68.62    | 69.02 ±0.11 | 84.16 ±0.09 | 84.23 ±0.29 | 90.94 ±0.07        | 45.28 ±0.55 | <b>89.24 ±0.07</b> | <b>91.52 ±0.03</b> |
| Elastic transform | 67.84    | 68.32 ±0.03 | 76.44 ±0.18 | 76.21 ±0.08 | 84.03 ±0.11        | 35.53 ±1.51 | <b>86.74 ±0.04</b> | 86.39 ±0.04        |
| Pixelate          | 56.3     | 55.94 ±0.08 | 76.34 ±0.10 | 76.40 ±0.16 | 84.92 ±0.15        | 33.64 ±0.83 | 87.93 ±0.03        | <b>88.06 ±0.20</b> |
| JPEG compression  | 70.62    | 70.44 ±0.18 | 69.64 ±0.03 | 69.54 ±0.05 | 76.46 ±0.04        | 28.01 ±1.75 | <b>85.11 ±0.06</b> | 82.73 ±0.07        |
| Average           | 60.43    | 60.14       | 74.48       | 74.37       | 81.68              | 56.91       | 85.28              | <b>85.69</b>       |

Table 1. Accuracy (%) on CIFAR-10-C dataset with Level 4 corruption for NC-TTT compared to *state-of-the-art*.

|                   | ResNet50 | LAME [1]    | PTBN [4]    | TENT [7]    | TTT [6]     | TTT++ [3]   | ClusT3 [2]         | NC-TTT (ours)      |
|-------------------|----------|-------------|-------------|-------------|-------------|-------------|--------------------|--------------------|
| Gaussian Noise    | 33.99    | 32.37 ±0.16 | 64.55 ±0.13 | 64.67 ±0.17 | 74.10 ±0.09 | 80.29 ±0.81 | <b>81.55 ±0.09</b> | 81.09 ±0.09        |
| Shot noise        | 46.35    | 45.83 ±0.14 | 69.82 ±0.08 | 70.04 ±0.14 | 78.43 ±0.07 | 82.46 ±0.37 | <b>84.12 ±0.02</b> | 84.03 ±0.09        |
| Impulse Noise     | 59.90    | 59.43 ±0.13 | 72.08 ±0.14 | 71.95 ±0.33 | 76.32 ±0.10 | 79.20 ±0.38 | <b>83.75 ±0.01</b> | 83.73 ±0.05        |
| Defocus blur      | 79.29    | 79.67 ±0.11 | 87.62 ±0.17 | 87.39 ±0.05 | 93.25 ±0.06 | 87.68 ±0.38 | 91.74 ±0.07        | <b>93.51 ±0.08</b> |
| Glass blur        | 47.29    | 46.36 ±0.10 | 63.29 ±0.11 | 63.26 ±0.21 | 72.09 ±0.11 | 72.52 ±0.56 | <b>79.78 ±0.02</b> | 79.25 ±0.08        |
| Motion blur       | 63.42    | 63.72 ±0.07 | 81.13 ±0.13 | 80.99 ±0.08 | 86.48 ±0.09 | 69.59 ±1.38 | 88.02 ±0.10        | <b>89.02 ±0.02</b> |
| Zoom blur         | 67.86    | 68.23 ±0.08 | 84.57 ±0.11 | 84.34 ±0.06 | 91.00 ±0.02 | 73.23 ±2.33 | 89.90 ±0.07        | <b>91.86 ±0.10</b> |
| Snow              | 74.93    | 74.78 ±0.05 | 75.08 ±0.14 | 75.14 ±0.19 | 83.90 ±0.07 | 57.96 ±1.02 | 86.22 ±0.07        | <b>87.17 ±0.05</b> |
| Frost             | 64.54    | 64.16 ±0.08 | 74.15 ±0.04 | 73.98 ±0.14 | 84.13 ±0.10 | 49.94 ±3.53 | <b>87.37 ±0.07</b> | 88.05 ±0.05        |
| Fog               | 85.73    | 85.98 ±0.16 | 86.57 ±0.09 | 86.38 ±0.15 | 92.19 ±0.08 | 52.89 ±4.13 | 91.83 ±0.01        | <b>93.55 ±0.01</b> |
| Brightness        | 88.93    | 88.67 ±0.08 | 87.50 ±0.19 | 87.44 ±0.01 | 93.53 ±0.09 | 57.96 ±1.32 | 93.31 ±0.04        | <b>94.61 ±0.01</b> |
| Contrast          | 79.66    | 79.99 ±0.05 | 85.63 ±0.05 | 85.46 ±0.08 | 91.85 ±0.09 | 53.44 ±2.37 | 90.83 ±0.05        | <b>92.54 ±0.09</b> |
| Elastic transform | 75.67    | 75.96 ±0.14 | 82.72 ±0.14 | 82.56 ±0.15 | 90.09 ±0.10 | 36.49 ±3.72 | 89.33 ±0.11        | <b>90.95 ±0.03</b> |
| Pixelate          | 74.83    | 75.12 ±0.04 | 82.17 ±0.14 | 81.91 ±0.13 | 89.30 ±0.10 | 33.41 ±3.02 | 90.23 ±0.06        | <b>91.44 ±0.05</b> |
| JPEG compression  | 73.70    | 73.66 ±0.16 | 71.54 ±0.09 | 71.54 ±0.15 | 78.95 ±0.09 | 28.82 ±2.74 | <b>86.55 ±0.06</b> | 85.10 ±0.01        |
| Average           | 67.74    | 67.60       | 77.89       | 77.80       | 85.04       | 61.06       | 87.64              | <b>88.39</b>       |

Table 2. Accuracy (%) on CIFAR-10-C dataset with Level 3 corruption for NC-TTT compared to *state-of-the-art*.

## References

- [1] Malik Boudiaf, Romain Mueller, Ismail Ben Ayed, and Luca Bertinetto. Parameter-free online test-time adaptation. In *IEEE/CVF Conference on Computer Vision and Pattern Recognition (CVPR)*, pages 8344–8353, 2022. 2, 3
- [2] Gustavo A. Vargas Hakim, David Osowiechi, Mehrdad Noori, Milad Cheraghalikhani, Ali Bahri, Ismail Ben Ayed, and Christian Desrosiers. ClusT3: Information Invariant Test-Time Training. pages 6136–6145, 2023. 1, 2, 3
- [3] Yuejiang Liu, Parth Kothari, Bastien van Delft, Baptiste Bellot-Gurlet, Taylor Mordan, and Alexandre Alahi. Ttt++: When does self-supervised test-time training fail or thrive? *Neural Information Processing Systems (NeurIPS)*, 2021. 1, 2, 3
- [4] Zachary Nado, Shreyas Padhy, D. Sculley, Alexander D’Amour, Balaji Lakshminarayanan, and Jasper Snoek. Evaluating prediction-time batch normalization for robustness under covariate shift. *arXiv:2006.10963 [cs, stat]*, 2021. arXiv: 2006.10963. 2, 3
- [5] David Osowiechi, Gustavo A. Vargas Hakim, Mehrdad Noori, Milad Cheraghalikhani, Ismail Ayed, and Christian Desrosiers. Tttflow: Unsupervised test-time training with normalizing flow. In *2023 IEEE/CVF Winter Conference on Applications of Computer Vision (WACV)*, pages 2125–2126, Los Alamitos, CA, USA, 2023. IEEE Computer Society. 1
- [6] Yu Sun, Xiaolong Wang, Zhuang Liu, John Miller, Alexei A. Efros, and Moritz Hardt. Test-time training with self-supervision for generalization under distribution shifts. In *International Conference on Machine Learning (ICML)*, 2020.

|                   | ResNet50 | LAME [1]    | PTBN [4]    | TENT [7]    | TTT [6]     | TTT++ [3]   | ClusT3 [2]         | NC-TTT (ours)      |
|-------------------|----------|-------------|-------------|-------------|-------------|-------------|--------------------|--------------------|
| Gaussian Noise    | 50.53    | 50.02 ±0.24 | 71.31 ±0.16 | 71.43 ±0.08 | 81.18 ±0.11 | 85.41 ±2.26 | <b>86.07 ±0.08</b> | 85.37 ±0.08        |
| Shot noise        | 69.27    | 69.47 ±0.22 | 78.97 ±0.19 | 79.02 ±0.17 | 87.54 ±0.10 | 88.79 ±0.44 | 89.77 ±0.04        | <b>90.15 ±0.09</b> |
| Impulse Noise     | 68.57    | 68.68 ±0.08 | 77.09 ±0.13 | 77.03 ±0.15 | 82.20 ±0.13 | 84.27 ±0.29 | 86.60 ±0.03        | <b>86.89 ±0.11</b> |
| Defocus blur      | 87.45    | 87.46 ±0.14 | 88.20 ±0.11 | 88.06 ±0.06 | 93.67 ±0.06 | 90.85 ±0.42 | 92.87 ±0.01        | <b>94.32 ±0.01</b> |
| Glass blur        | 43.26    | 42.04 ±0.19 | 62.66 ±0.09 | 62.55 ±0.11 | 71.33 ±0.04 | 71.60 ±1.95 | 78.81 ±0.11        | <b>79.86 ±0.06</b> |
| Motion blur       | 72.98    | 73.14 ±0.06 | 83.51 ±0.16 | 83.46 ±0.10 | 89.57 ±0.07 | 77.38 ±1.12 | 89.78 ±0.13        | <b>91.23 ±0.04</b> |
| Zoom blur         | 74.89    | 75.23 ±0.18 | 85.81 ±0.21 | 85.79 ±0.05 | 92.05 ±0.10 | 80.30 ±1.45 | 90.82 ±0.04        | <b>92.76 ±0.10</b> |
| Snow              | 71.11    | 70.78 ±0.12 | 74.73 ±0.11 | 74.69 ±0.22 | 82.96 ±0.08 | 68.56 ±1.36 | 86.30 ±0.04        | <b>87.55 ±0.05</b> |
| Frost             | 76.67    | 76.46 ±0.02 | 79.54 ±0.15 | 79.41 ±0.27 | 87.67 ±0.03 | 63.66 ±3.39 | 90.27 ±0.10        | <b>91.09 ±0.03</b> |
| Fog               | 88.51    | 88.55 ±0.08 | 87.62 ±0.10 | 87.60 ±0.17 | 93.23 ±0.04 | 64.26 ±3.37 | 93.07 ±0.04        | <b>94.46 ±0.02</b> |
| Brightness        | 89.75    | 89.52 ±0.01 | 88.09 ±0.03 | 87.97 ±0.14 | 93.69 ±0.08 | 67.19 ±1.23 | 93.64 ±0.01        | <b>94.97 ±0.04</b> |
| Contrast          | 84.58    | 84.87 ±0.07 | 86.19 ±0.17 | 86.41 ±0.04 | 92.50 ±0.12 | 62.90 ±1.93 | 92.00 ±0.01        | <b>3.50 ±0.08</b>  |
| Elastic transform | 82.10    | 82.17 ±0.10 | 83.69 ±0.13 | 83.68 ±0.08 | 90.98 ±0.12 | 50.06 ±2.37 | 90.37 ±0.01        | <b>91.60 ±0.05</b> |
| Pixelate          | 81.04    | 80.96 ±0.13 | 82.92 ±0.14 | 83.01 ±0.07 | 90.61 ±0.15 | 43.33 ±3.31 | 91.28 ±0.09        | <b>92.46 ±0.06</b> |
| JPEG compression  | 76.06    | 75.92 ±0.09 | 73.63 ±0.02 | 73.56 ±0.13 | 81.37 ±0.11 | 28.26 ±2.78 | <b>87.86 ±0.08</b> | 86.27 ±0.03        |
| Average           | 74.45    | 74.35       | 80.26       | 80.24       | 87.37       | 68.45       | 89.30              | <b>90.17</b>       |

Table 3. Accuracy (%) on CIFAR-10-C dataset with Level 2 corruption for NC-TTT compared to *state-of-the-art*.

|                   | ResNet50 | LAME [1]    | PTBN [4]    | TENT [7]    | TTT [6]     | TTT++ [3]   | ClusT3 [2]         | NC-TTT (ours)      |
|-------------------|----------|-------------|-------------|-------------|-------------|-------------|--------------------|--------------------|
| Gaussian Noise    | 71.38    | 71.35 ±0.05 | 79.22 ±0.13 | 79.52 ±0.12 | 88.38 ±0.12 | 90.14 ±1.05 | <b>90.35 ±0.05</b> | 90.29 ±0.01        |
| Shot noise        | 80.39    | 80.32 ±0.07 | 82.21 ±0.05 | 82.18 ±0.15 | 90.43 ±0.02 | 90.89 ±0.29 | 91.42 ±0.02        | <b>92.25 ±0.02</b> |
| Impulse Noise     | 80.04    | 79.98 ±0.09 | 82.39 ±0.08 | 82.48 ±0.15 | 88.23 ±0.02 | 87.76 ±0.06 | 90.51 ±0.06        | <b>91.07 ±0.05</b> |
| Defocus blur      | 90.17    | 89.9 ±0.06  | 88.28 ±0.04 | 88.26 ±0.15 | 93.89 ±0.04 | 91.51 ±0.48 | 93.72 ±0.09        | <b>95.12 ±0.02</b> |
| Glass blur        | 40.96    | 39.87 ±0.16 | 63.19 ±0.05 | 63.22 ±0.15 | 71.12 ±0.07 | 72.12 ±2.13 | 79.01 ±0.21        | <b>79.78 ±0.05</b> |
| Motion blur       | 82.78    | 82.81 ±0.11 | 85.99 ±0.09 | 85.89 ±0.08 | 91.97 ±0.05 | 84.11 ±0.91 | 91.50 ±0.13        | <b>93.15 ±0.07</b> |
| Zoom blur         | 78.58    | 79.03 ±0.06 | 86.19 ±0.06 | 86.23 ±0.04 | 92.21 ±0.08 | 81.76 ±1.38 | 90.87 ±0.04        | <b>92.60 ±0.07</b> |
| Snow              | 83.45    | 83.32 ±0.11 | 82.94 ±0.13 | 82.84 ±0.35 | 88.90 ±0.04 | 75.89 ±0.75 | 90.33 ±0.02        | <b>91.57 ±0.03</b> |
| Frost             | 84.84    | 84.44 ±0.10 | 83.88 ±0.15 | 83.71 ±0.24 | 91.17 ±0.03 | 71.54 ±3.13 | 92.19 ±0.06        | <b>93.16 ±0.08</b> |
| Fog               | 90.15    | 90.05 ±0.05 | 88.31 ±0.13 | 88.05 ±0.06 | 93.71 ±0.09 | 70.58 ±1.29 | 93.64 ±0.01        | <b>95.11 ±0.03</b> |
| Brightness        | 90.35    | 90.24 ±0.06 | 88.28 ±0.09 | 88.35 ±0.25 | 93.90 ±0.06 | 64.40 ±2.69 | 93.83 ±0.05        | <b>95.28 ±0.02</b> |
| Contrast          | 89.52    | 89.57 ±0.07 | 87.98 ±0.09 | 87.93 ±0.08 | 93.61 ±0.05 | 53.60 ±3.80 | 93.61 ±0.03        | <b>94.95 ±0.06</b> |
| Elastic transform | 82.46    | 82.72 ±0.06 | 83.29 ±0.17 | 83.28 ±0.27 | 90.55 ±0.09 | 39.92 ±1.52 | 90.33 ±0.06        | <b>91.62 ±0.07</b> |
| Pixelate          | 87.27    | 87.18 ±0.08 | 85.79 ±0.12 | 85.81 ±0.17 | 92.24 ±0.01 | 36.04 ±3.47 | 92.74 ±0.04        | <b>93.84 ±0.03</b> |
| JPEG compression  | 82.03    | 81.66 ±0.07 | 79.72 ±0.10 | 79.82 ±0.14 | 86.86 ±0.08 | 30.90 ±1.18 | <b>90.90 ±0.01</b> | 90.18 ±0.05        |
| Average           | 80.96    | 80.83       | 83.17       | 83.17       | 89.81       | 69.41       | 91.00              | <b>92.00</b>       |

Table 4. Accuracy (%) on CIFAR-10-C dataset with Level 1 corruption for NC-TTT compared to *state-of-the-art*.

1, 2, 3

[7] Dequan Wang, Evan Shelhamer, Shaoteng Liu, Bruno Olshausen, and Trevor Darrell. Tent: Fully test-time adaptation by entropy minimization. 2021. 2, 3
